# Supplementary material for: Pleural Mesothelial Cells Modulate the Inflammatory/Profibrotic Response During SARS-CoV-2 Infection
Source: Frontiers journal article supplement (doi:10.3389/fmolb.2021.752616), 2021-11-26
Supplement: Data_Sheet_4.PDF [file Data_Sheet_4.PDF]

## Supporting information captions

**Supplementary figure 1** IHCs showing SARS-CoV-2 detection in lung samples (**A**) IHC anti-SARS-CoV nucleoprotein in COVID-19 autptic visceral pleura shows no labelling in the epithelial-like MCs (arrows). (**B**) A focal distribution of the positivity is revealed in alveolar lung epithelial cells (arrows). Scale bars: A = 7  $\mu\text{m}$ ; B =14  $\mu\text{m}$ .

**Supplementary figure 2:** (**A**) viability assay of MeT5A cells infected with SARS-CoV-2. Left: Representative Staining at 24-72 h d.p.i using ViaKrome Fixable Viability Dye. Right: quantification of the percentages of positive dead cells in untreated versus SARS-CoV-2 infected MeT5A cells. The experiment was repeated three times. n.s.=not significant (**B**) WB showing the expression of cleaved caspase 3 from total lysates of MeT5A cells infected as in A. Hsp90 was detected as a loading control. SA. Sodium arsenite (2.5  $\mu\text{M}$ ) was used as positive control.

**Supplementary figure 3:** Complete Luminex analysis of supernatant from SARS-Co-V2-infected MeT5A cells
